# Supplementary material for: Genetic Diversity of Microneme Protein 2 and Surface Antigen 1 of Eimeria tenella
Source: MDPI journal article supplement (doi:10.3390/genes12091418), 2021-09-15
Supplement: s1 [file s1]

**Table S2.** List of sequences analyzed in this study.

| Gene          | Origin   | Number of sequences | GenBank accession numbers         |
|---------------|----------|---------------------|-----------------------------------|
| <i>etmic2</i> | Houghton | 1                   | XM 013377912.1                    |
|               | China    | 21                  | KY117173.1–KY117192.1, AF111839.1 |
|               | India    | 1                   | FJ807654.1                        |
| <i>etsag1</i> | Houghton | 1                   | AJ586531.2                        |
|               | China    | 21                  | KY117193.1–KY117212.1, DQ327836.1 |
|               | India    | 2                   | KF718807.1, KF718808.1            |
