# Supplementary material for: Genetic Diversity of Microneme Protein 2 and Surface Antigen 1 of Eimeria tenella
Source: MDPI journal article supplement (doi:10.3390/genes12091418), 2021-09-15
Supplement: s1 [file s1]

**Table S1.** List of primers used in this study.

| Gene          | Primer   | Sequence (5'-3')          | Amplicon size (bp) | Thermal cycle                                                                                                                                            |
|---------------|----------|---------------------------|--------------------|----------------------------------------------------------------------------------------------------------------------------------------------------------|
| <i>etmic2</i> | EtMIC2F  | CAAGAAGTATCTTAAGCCTGC     | 1291               | <ul style="list-style-type: none"> <li>• 95 °C 5 min</li> <li>• 30 cycles of (95 °C 1 min, 52 °C 1 min, 72 °C 1.5 min)</li> <li>• 72 °C 5 min</li> </ul> |
|               | EtMIC2R  | GCTTGAACCTCTTCCAGATC      |                    |                                                                                                                                                          |
|               | EtMIC2NF | CAGGCGAAGATAGCTTCTCTCC    | 1188               | <ul style="list-style-type: none"> <li>• 95 °C 5 min</li> <li>• 35 cycles of (95 °C 1 min, 58 °C 1 min, 72 °C 1.5 min)</li> <li>• 72 °C 5 min</li> </ul> |
|               | EtMIC2NR | CCTTCAGGATGACTGTTGAGTGTC  |                    |                                                                                                                                                          |
| <i>etsagl</i> | EtSAG1F  | ATGGCTCGTCTTTCTTTTGTTTCTC | 1101               | <ul style="list-style-type: none"> <li>• 95 °C 5 min</li> <li>• 30 cycles of (95 °C 1 min, 55 °C 1 min, 72 °C 1.5 min)</li> <li>• 72 °C 5 min</li> </ul> |
|               | EtSAG1R  | ATCTCCGCTTTCGCTCTCTTTTAG  |                    |                                                                                                                                                          |
|               | EtSAG1NF | CAGGATTACCCAACAGCAGGTG    | 979                | <ul style="list-style-type: none"> <li>• 95 °C 5 min</li> <li>• 35 cycles of (95 °C 1 min, 58 °C 1 min, 72 °C 1.5 min)</li> <li>• 72 °C 5 min</li> </ul> |
|               | EtSAG1NR | GGACGACTGGAGAACTCCGC      |                    |                                                                                                                                                          |
